# Supplementary material
Source: Royal Society of Chemistry journal article supplement (doi:10.1039/d6dt00376a)
Supplement: d6dt00376a1.pdf [file d6dt00376a1.pdf]

# Supplementary Information

## **Dual-emissive CsPbBr<sub>3</sub>@NaGdF<sub>4</sub>:Eu<sup>3+</sup> nanocomposites for ratiometric temperature sensing and anti-counterfeiting applications**

**Xue Song<sup>a</sup>, Le Han<sup>a</sup>, Lin Yang<sup>a</sup>, Yan Xu<sup>a, b\*</sup>**

<sup>a</sup>Department of Chemistry, College of Sciences, Northeastern University, Shenyang, Liaoning 110819, PR China

<sup>b</sup>Foshan Graduate School of Innovation, Northeastern University, Foshan, Guangdong, 528311, PR China

**\*Corresponding author:**

E-mail: xuyan@mail.neu.edu.cn (Y. Xu)

ORCID

**Yan Xu: 0000-0002-7608-7013**

Due to the energy transfer process and the presence of two distinct luminescent centers in the CPB@NGF:40%Eu<sup>3+</sup> nanocomposite, the measured fluorescence decay curves typically no longer follow a single-exponential decay law. Therefore, a double-exponential function must be used to fit the decay curves, and its form can be described by the following equation:

$$I(t) = A_1 \exp\left(-\frac{t}{\tau_1}\right) + A_2 \exp\left(-\frac{t}{\tau_2}\right)$$

The average lifetime value is calculated using the following formula:

$$\tau_{\text{avg}} = \frac{A_1 \tau_1^2 + A_2 \tau_2^2}{A_1 \tau_1 + A_2 \tau_2}$$

$\tau_1$  and  $\tau_2$  are the lifetimes of two different fluorescence emission pathways, radiative transition and non-radiative transition, while  $A_1$  and  $A_2$  represent their respective relative weights at  $t=0$ . Detailed fitting data are shown in Table S1 and S2.

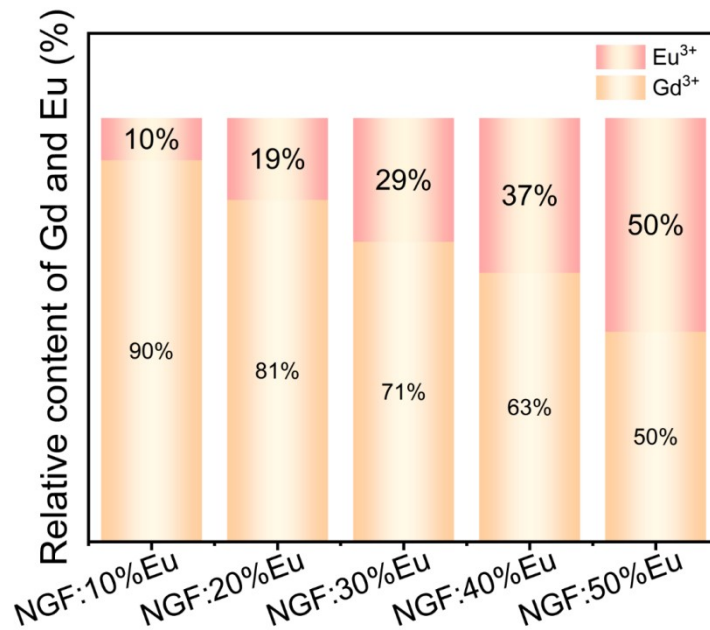

Fig. S1 ICP-OES test results for NGF:x%Eu<sup>3+</sup>.

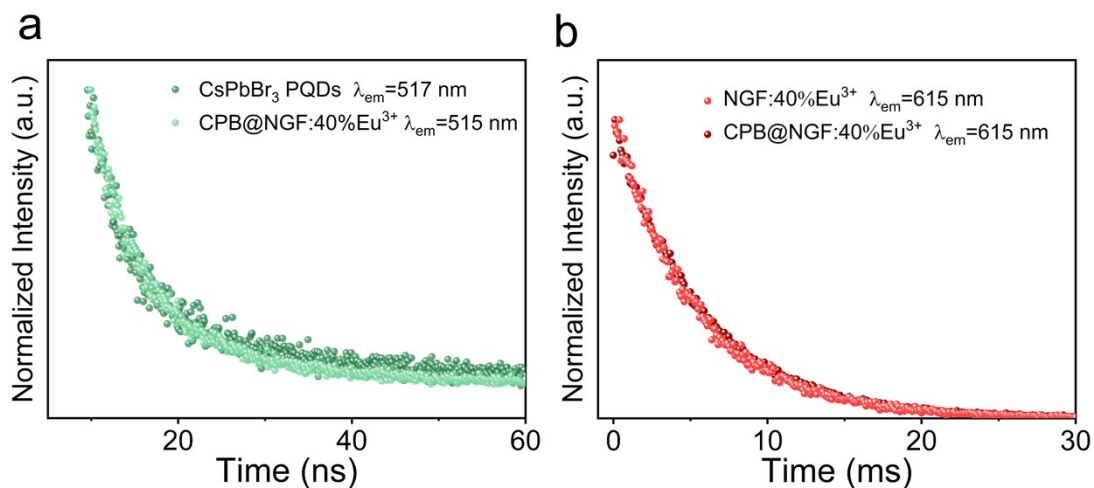

Fig. S2 (a) Fluorescence lifetimes of CsPbBr<sub>3</sub> PQDs before and after encapsulation; (b) fluorescence lifetimes of Eu<sup>3+</sup> before and after encapsulation.

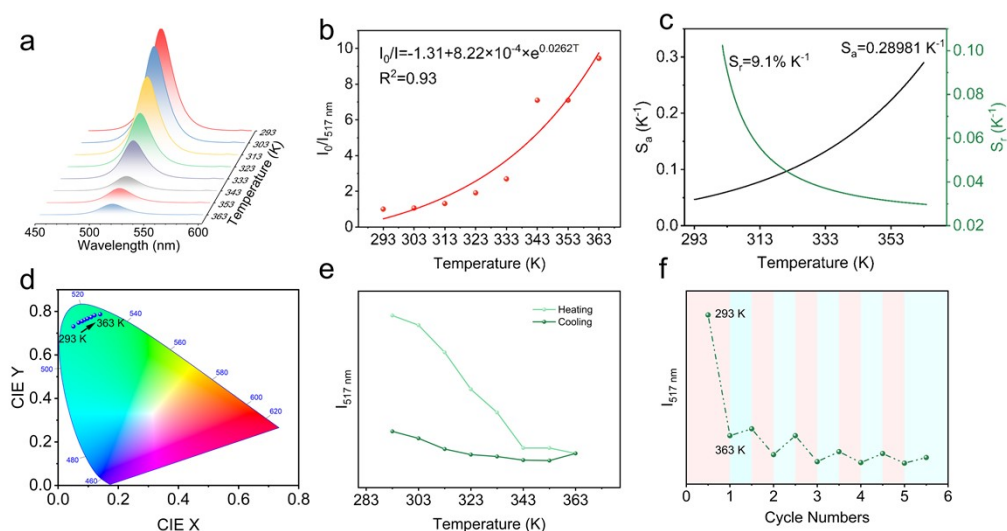

Fig. S3 (a) Temperature-dependent steady-state emission spectra of pure CsPbBr<sub>3</sub> PQDs over the temperature range of 293 K-363 K; (b) Exponential fitting curves of  $I_0/I_{517\text{ nm}}$  versus temperature at 293 K-363 K; (c)  $S_a$  and  $S_r$  of pure CsPbBr<sub>3</sub> PQDs versus temperature; (d) Corresponding CIE chromaticity diagram at different temperatures; (e) PL intensity changes of pure CsPbBr<sub>3</sub> PQDs. (f) pure CsPbBr<sub>3</sub> PQDs under heating and cooling cycles from 293 K to 363 K.

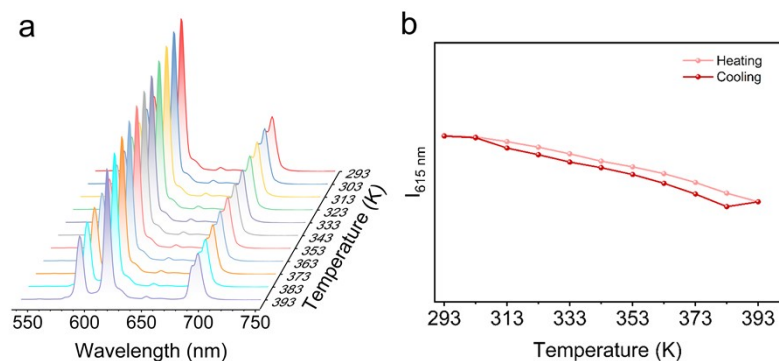

Fig. S4 (a) Temperature-dependent steady-state emission spectra of NGF:40%Eu<sup>3+</sup> over the temperature range of 293 K-393 K; (b) PL intensity changes of NGF:40%Eu<sup>3+</sup>.

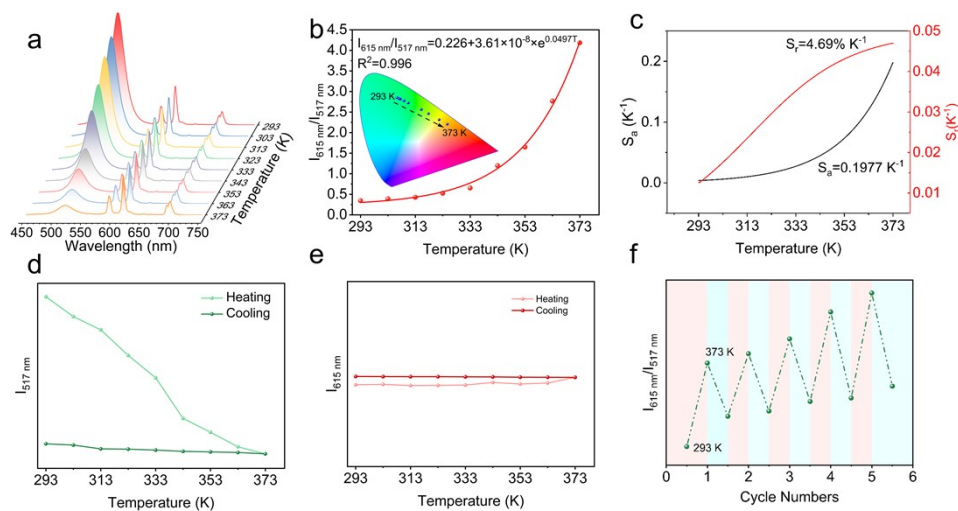

Fig. S5 (a) Temperature-dependent steady-state emission spectra of mixture of CsPbBr<sub>3</sub> PQDs and NGF:40%Eu<sup>3+</sup> over the temperature range of 293 K-373 K; (b) Exponential fitting curves of  $I_{615 \text{ nm}}/I_{517 \text{ nm}}$  versus temperature at 293 K-373 K (Inset:Corresponding CIE chromaticity diagram at different temperatures); (c)  $S_a$  and  $S_r$  of mixture of CsPbBr<sub>3</sub> PQDs and NGF:40%Eu<sup>3+</sup> versus temperature; PL intensity changes in 517 nm (g) and 615 nm (h) during heating-cooling processes; (f) Mixture of CsPbBr<sub>3</sub> PQDs and NGF:40%Eu<sup>3+</sup> under heating and cooling cycles.

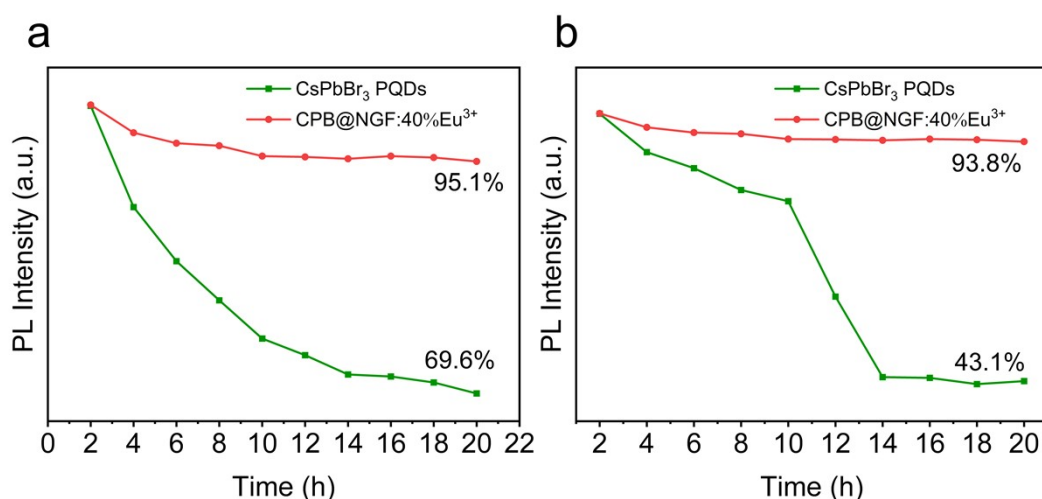

Fig. S6 (a) Relative fluorescence intensities of pure CsPbBr<sub>3</sub> PQDs and CPB@NGF:40% Eu<sup>3+</sup> nanocomposites measured at room temperature at different time intervals; (b) Relative fluorescence intensities of pure CsPbBr<sub>3</sub> PQDs and CPB@NGF:40% Eu<sup>3+</sup> nanocomposites measured at different time intervals under intense UV irradiation.

Table S1. PL decay parameters of CsPbBr<sub>3</sub> PQDs before and after encapsulation at an excitation wavelength of 395 nm

| Samples                     | t <sub>1</sub> (ns) | t <sub>2</sub> (ns) | A <sub>1</sub> | A <sub>2</sub> | τ (ns) |
|-----------------------------|---------------------|---------------------|----------------|----------------|--------|
| CsPbBr <sub>3</sub> PQDs    | 4.30                | 19.82               | 6.21           | 0.44           | 8.13   |
| CPB@NGF:40%Eu <sup>3+</sup> | 4.52                | 14.30               | 5.61           | 0.65           | 7.14   |

Table S2. PL decay parameters of Eu<sup>3+</sup> before and after encapsulation at an excitation wavelength of 395 nm

| Samples                     | t <sub>1</sub> (ms) | t <sub>2</sub> (ms) | A <sub>1</sub> | A <sub>2</sub> | τ (ms) |
|-----------------------------|---------------------|---------------------|----------------|----------------|--------|
| NGF:40%Eu <sup>3+</sup>     | 4.88                | 6.93                | 0.50           | 0.23           | 5.69   |
| CPB@NGF:40%Eu <sup>3+</sup> | 5.70                | 5.70                | 0.50           | 0.49           | 5.70   |
